# Supplementary material
Source: PubMed Central journal article supplement (PMC4679011)
Supplement: pnas.1520426112.sapp.pdf [file pnas.1520426112.sapp.pdf]

## **Supplementary Materials**

### ***Plasmodium* Evasion of Mosquito Immunity and Global Malaria Transmission: The Lock and Key Theory**

Alvaro Molina-Cruz , Gaspar E. Canepa, Nitin Kamath, Noelle V. Pavlovic, Jianbing Mu,  
Urvashi N. Ramphul, Jose Luis Ramirez and Carolina Barillas-Mury

Laboratory of Malaria and Vector Research, National Institute of Allergy and Infectious  
Diseases, National Institutes of Health, Rockville, MD 20852.

Correspondence should be addressed to: [cbarillas@niaid.nih.gov](mailto:cbarillas@niaid.nih.gov) (CB-M) and [amolina-cruz@niaid.nih.gov](mailto:amolina-cruz@niaid.nih.gov) (AM-C)

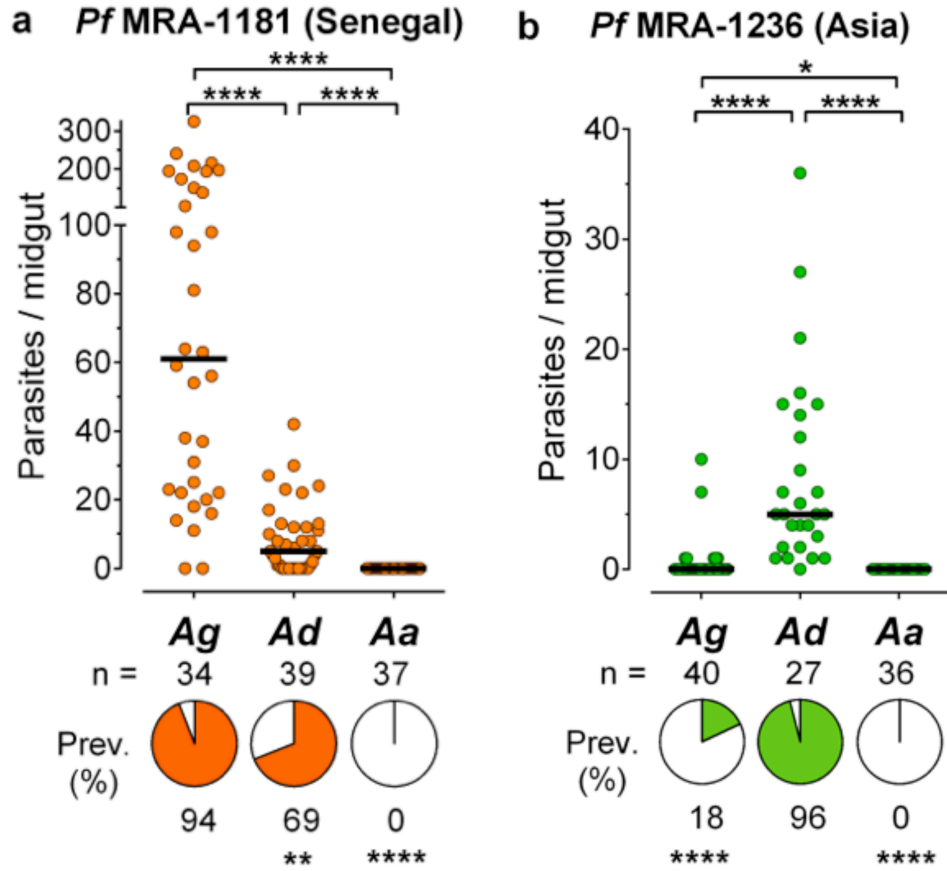

**Fig.S1.** Compatibility between *Plasmodium falciparum* isolates from different geographic origin and different anopheline mosquito species. **a,b**, Infection of *Anopheles gambiae* (Ag), *Anopheles dirus* (Ad) and *Anopheles albimanus* (Aa) mosquitoes with *P. falciparum* MRA-1181 (African) (**a**) or MRA-1236 (Asian) (**b**) lines. Each circle represents the number of oocysts present in the midgut of individual mosquitoes and the medians are indicated by the black line (n= number of midguts examined). Pie charts represent the prevalence of infection. All phenotypes were confirmed in two independent experiments. Medians were compared using the Mann-Whitney test; prevalence of infection were compared with the  $\chi^2$  test, \*  $p < 0.05$ , \*\*  $p < 0.01$ , \*\*\*  $p < 0.001$ , \*\*\*\*  $p < 0.0001$ .

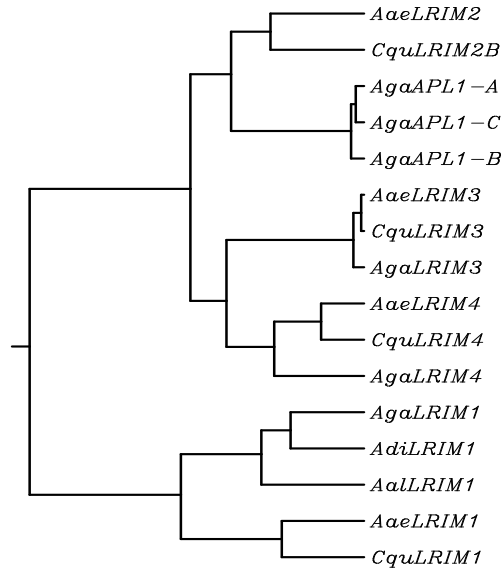

**Fig S2.** Phylogenetic tree (neighbor-joining) of LRIM family members (Long form) from *Anopheles gambiae* (Aga), *Aedes aegypti* (Aae), *Culex quinquefasciatus* (Cqu) and LRIM1 from *Anopheles dirus* (Adi) and *Anopheles albimanus* (Aal).

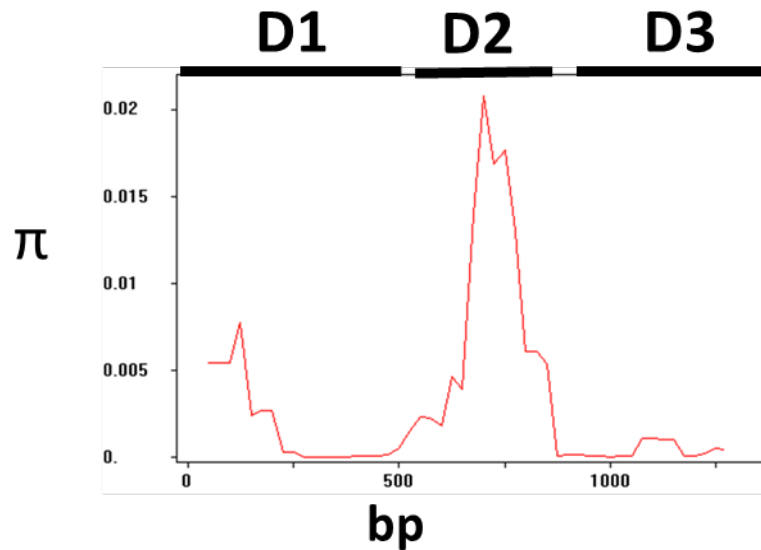

**Fig S3.** Nucleotide diversity along Pfs47 nucleotide sequence. The nucleotide diversity ( $\pi$ ) in a 100bp sliding window along Pfs47 was estimated from 364 gene sequences from around the world. The predicted domain (D) 1, 2 and 3 position is indicated.

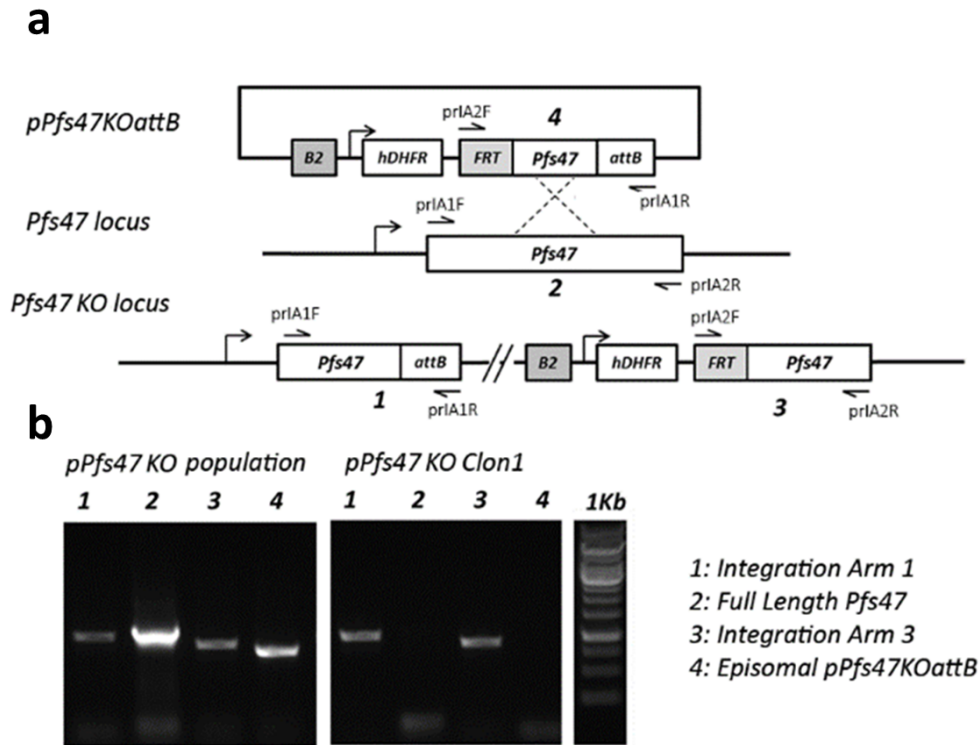

**Fig.S4.** Strategy for the generation of the *Pfs47KO* line and its genotype confirmation. **a**, Schematic representation of the predicted disruption of the *Pfs47* gene on chromosome 13 via a single-crossover strategy by transfection of the plasmid *pPfs47KOattB* in *P. falciparum* NF54. The drug selection cassette *hDHFR* and the recombination adaptor sites *B2*, *FRT* and *attB* are showed. **b**, Genotypic characterisation with integration-specific PCR products before and after cloning of parasites by minimal dilution, based on different combination of primers pair *prIA1F/prIA1R* and *prIA2F/prIA2R*. Lane 1 and 3 corresponds to the integration arms 1 and 2, respectively, lane 2 correspond to full length *Pfs47* and lane 4 correspond to the presence of episomal plasmid. Representation is not in scale and is for illustration purposes only.

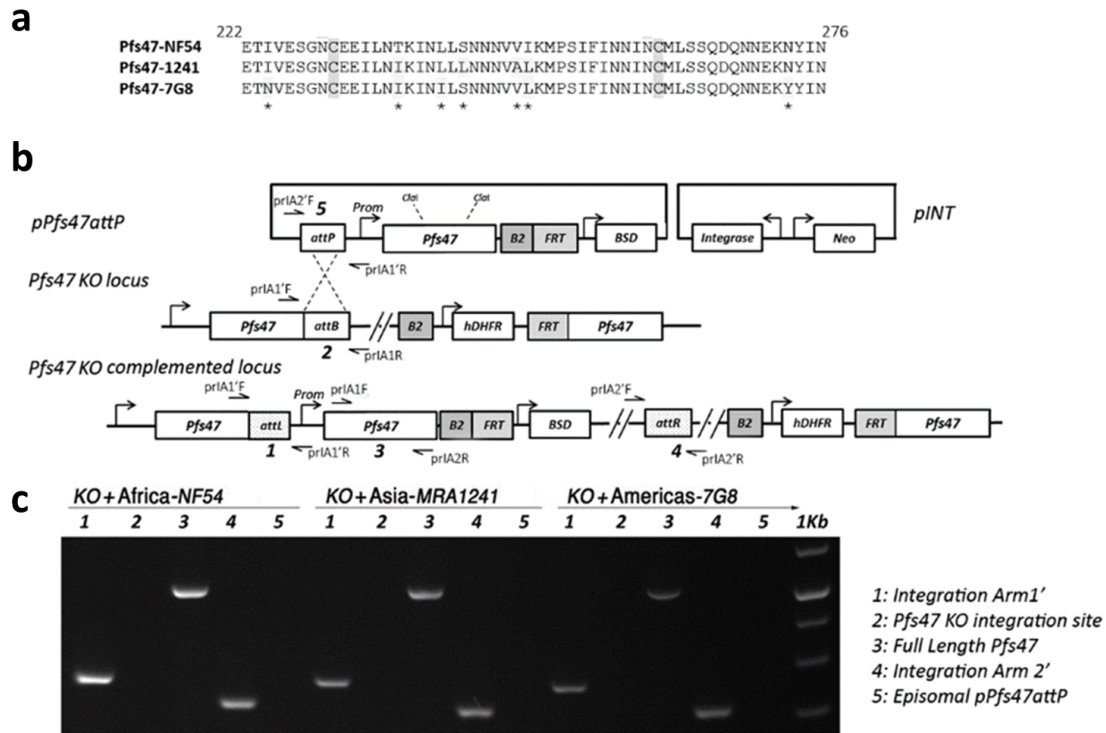

**Fig. S5.** Strategy for the complementation of the *Pfs47KO* line with representative haplotypes of *Pfs47* from different continents and its genotype confirmation. **a**, Amino acid alignment of *Pfs47* haplotypes (NF54, 1241, 7G8) used in this study to complement the *Pfs47KO* line. Only the region with polymorphisms within domain 2 (marked with an asterisk) is showed (aa222-aa276). **b**, Schematic representation of the integrase-mediated complementation of different *Pfs47* haplotypes on the *Pfs47KO* locus by the plasmid pPfs47attP. The drug selection cassettes hDHFR, BSD and Neo and the recombination adaptor sites B2, FRT and attB are showed. **c**, Genotype confirmation of the complementation of the *Pfs47KO*. Integration-specific PCR products after cloning of parasites by minimal dilution, based on different combination of the primers pairs prIA1'F/prIA1'R, prIA2'F/prIA2'R, prIA1F/prIA1R and prIA2F/prIA2R. Lane 1 and 4 corresponds to the integration arms 1 and 2, respectively, lane 2 correspond to the *Pfs47KO* integration site, lane 3 correspond to full length *Pfs47* and lane 5 corresponds to the presence of episomal plasmid. Representation is not in scale and is for illustration purposes only.

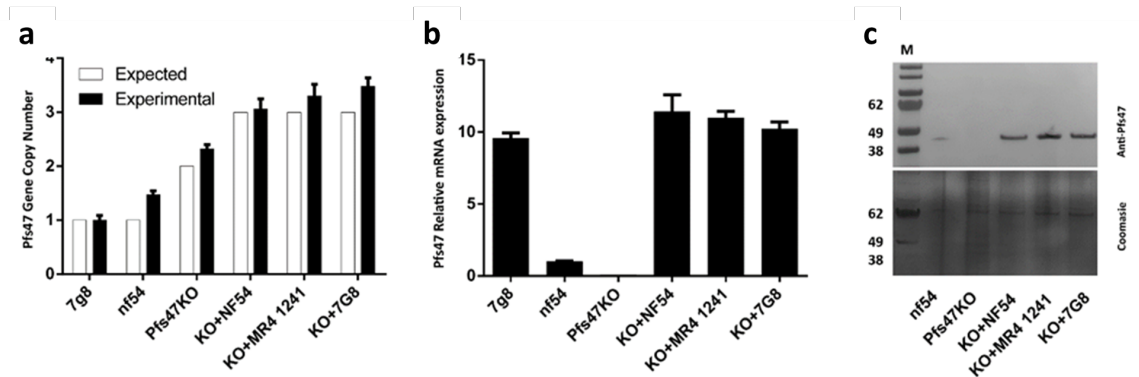

**Fig. S6.** Gene copy number and expression analysis of *Pfs47* in the *P. falciparum* lines generated in this study. **a**, *Pfs47* gene copy number of the different lines generated was assessed by qPCR. Primers were designed to amplify a 84bp sequence included in *Pfs47* 851 bp internal fragment in order to detect one copy in the wild type strain, two in the *Pfs47KO* and three in the complemented ones. **b**, Relative mRNA expression of *Pfs47* in wild-type (7G8 and NF54), *Pfs47* knockout (KO), and the KO line complemented with the NF54 or 7G8 or MR4 1241 allele of *Pfs47*. Relative mRNA expression of *Pfs47* was assessed by qPCR in stage IV–V gametocyte cultures. Detection of *Pfs47* mRNA in the complemented lines confirms gene expression upon complementation of the *Pfs47KO* line under the *P. falciparum* 7G8 promoter. **c**, Western blot analysis of expression of Pfs47 protein in equivalent amounts of gametocyte cultures of wild-type (NF54), *Pfs47KO*, and *Pfs47KO* line complemented with the NF54 or 7G8 or MR4- 1241 allele of *Pfs47*. Detection of *Pfs47* protein in the complemented lines confirms gene expression upon complementation of the *Pfs47KO* line.

| <i>P. falciparum</i> strain | Experiment 1     |           |           | Experiment 2     |           |           |
|-----------------------------|------------------|-----------|-----------|------------------|-----------|-----------|
|                             | <i>Ag</i>        | <i>Ad</i> | <i>Aa</i> | <i>Ag</i>        | <i>Ad</i> | <i>Aa</i> |
| NF54                        |                  |           |           |                  |           |           |
| n (midguts)                 | 38               | 40        | 36        | 32               | 32        | 30        |
| Oocyst/mgt Median           | 21               | 2.5***    | 0****     | 91.5             | 6.5****   | 0****     |
| (range)                     | (0-155)          | (0-61)    | (0-11)    | (10-215)         | (0-76)    | (0-15)    |
| Prevalence (%)              | 92               | 60**      | 30****    | 100              | 87*       | 40****    |
| MRA-1241                    |                  |           |           |                  |           |           |
| n (midguts)                 | 40               | 30        | 30        | 45               | 28        | 30        |
| Oocyst/mgt Median           | 2****            | 49.5      | 0*****    | 3****            | 37.5      | 0****     |
| (range)                     | (0-54)           | (0-166)   | (0-2)     | (0-69)           | (0-125)   | (0-0)     |
| Prevalence (%)              | 68 <sup>ns</sup> | 87        | 13****    | 69 <sup>ns</sup> | 86        | 0****     |
| Pf 7G8                      |                  |           |           |                  |           |           |
| n (midguts)                 | 40               | 39        | 38        | 37               | 29        | 32        |
| Oocyst/mgt Median           | 1**              | 0****     | 2         | 1*               | 0****     | 2         |
| (range)                     | (0-8)            | (0-7)     | (0-26)    | (0-9)            | (0-4)     | (0-12)    |
| Prevalence (%)              | 53 <sup>ns</sup> | 28***     | 68        | 31*              | 3****     | 81        |

**Table S1.** Compatibility between *Plasmodium falciparum* isolates from different geographic origin and different anopheline mosquito species. Infection of *Anopheles gambiae* (*Ag*), *Anopheles dirus* (*Ad*) and *Anopheles albimanus* (*Aa*) mosquitoes with *P. falciparum* NF54 (putative African), MRA-1241 (Asian) and 7G8 (South America) lines. Table shows infection intensity and prevalence for two replicate experiments, results for Experiment 1 are also presented in Fig. 1 in the main text. Infection intensity medians were compared using the Mann-Whitney test; infection prevalences were compared with the  $\chi^2$  test, ns= no significant difference, \*  $p<0.05$ , \*\*  $p<0.01$ , \*\*\*  $p<0.001$ , \*\*\*\*  $p<0.0001$ .

| <i>P. falciparum</i> strain | Experiment 1               |                      | Experiment 2 |                   |
|-----------------------------|----------------------------|----------------------|--------------|-------------------|
| NF54                        | <i>Anopheles dirus</i>     |                      |              |                   |
|                             | dsLacZ                     | <i>Ad</i><br>dsLRIM1 | dsLacZ       | <i>Ad</i> dsLRIM1 |
| n (midguts)                 | 19                         | 19                   | 29           | 30                |
| Oocyst/mgt Median           | 4                          | 28**                 | 8            | 13.5***           |
| (range)                     | (0-46)                     | (0-157)              | (0-26)       | (3-47)            |
| Prevalence (%)              | 58                         | 84 <sup>ns</sup>     | 96           | 100 <sup>ns</sup> |
| NF54                        | <i>Anopheles albimanus</i> |                      |              |                   |
|                             | dsLacZ                     | <i>Aa</i><br>dsLRIM1 | dsLacZ       | <i>Aa</i> dsLRIM1 |
| n (midguts)                 | 38                         | 35                   | 32           | 32                |
| Oocyst/mgt Median           | 0                          | 184***               | 0            | 3****             |
| (range)                     | (0-42)                     | (18-277)             | (0-1)        | (0-10)            |
| Prevalence (%)              | 42                         | 100****              | 3            | 83****            |
| MRA-1241                    | <i>Anopheles albimanus</i> |                      |              |                   |
|                             | dsLacZ                     | <i>Aa</i><br>dsLRIM1 | dsLacZ       | <i>Aa</i> dsLRIM1 |
| n (midguts)                 | 39                         | 43                   | 38           | 26                |
| Oocyst/mgt Median           | 0                          | 40****               | 0            | 31****            |
| (range)                     | (0-14)                     | (3-115)              | (0-11)       | (0-289)           |
| Prevalence (%)              | 43                         | 100****              | 26           | 85****            |

**Table S2.** Effect of disrupting the mosquito complement-like system by silencing the leucine-rich repeat immune protein 1 (LRIM1) on susceptibility of *A. dirus* and *A. albimanus* to infection with incompatible *P. falciparum* strains. Female mosquitoes were injected with LacZ control or LRIM1 dsRNA 3 days before feeding on a gametocyte culture. Table shows infection intensity and prevalence for two replicate experiments, results for Experiment 1 are also presented in Fig. 1 in the main text. Infection intensity medians were compared using the Mann-Whitney test; infection prevalences were compared with the  $\chi^2$  test, ns = no significant difference, \* p<0.05, \*\* p<0.01, \*\*\* p<0.001, \*\*\*\* p<0.0001.

| P. falciparum NF54 transformant | Experiment 1     |                  |                  | Experiment 2     |                  |                 |
|---------------------------------|------------------|------------------|------------------|------------------|------------------|-----------------|
|                                 | Ag               | Ad               | Aa               | Ag               | Ad               | Aa              |
| Pfs47 KO                        |                  |                  |                  |                  |                  |                 |
| n (midguts)                     | 27               | 29               | 26               | 31               | 31               | 29              |
| Oocyst/mgt Median               | 0                | 2 <sup>ns</sup>  | 0 <sup>***</sup> | 0                | 0 <sup>ns</sup>  | 0 <sup>ns</sup> |
| (range)                         | (0-20)           | (0-22)           | 0                | (0-3)            | (0-8)            | 0               |
| Prevalence (%)                  | 22               | 34 <sup>ns</sup> | 0*               | 48               | 55 <sup>ns</sup> | 0****           |
| KO + Pfs47 Africa NF54          |                  |                  |                  |                  |                  |                 |
| n (midguts)                     | 25               | 27               | 23               | 29               | 29               | 25              |
| Oocyst/mgt Median               | 4                | 0****            | 0****            | 3                | 0****            | 0****           |
| (range)                         | (0-18)           | (0-2)            | (0-3)            | (0-14)           | (0-4)            | (0-2)           |
| Prevalence (%)                  | 72               | 34**             | 27**             | 73               | 38**             | 12****          |
| KO + Pfs47 Asia MRA-1241        |                  |                  |                  |                  |                  |                 |
| n (midguts)                     | 30               | 30               | 25               | 26               | 27               | 20              |
| Oocyst/mgt Median               | 0***             | 6                | 0****            | 0***             | 4                | 0****           |
| (range)                         | (0-4)            | (0-22)           | (0-1)            | (0-6)            | (0-10)           | 0               |
| Prevalence (%)                  | 45 <sup>ns</sup> | 67               | 12****           | 47*              | 78               | 0***            |
| KO + Pfs47 Americas 7G8         |                  |                  |                  |                  |                  |                 |
| n (midguts)                     | 31               | 26               | 27               | 27               | 26               | 24              |
| Oocyst/mgt Median               | 1 <sup>ns</sup>  | 0 <sup>ns</sup>  | 1                | 1 <sup>ns</sup>  | 0 <sup>ns</sup>  | 1               |
| (range)                         | (0-7)            | (0-8)            | (0-8)            | (0-5)            | (0-3)            | (0-4)           |
| Prevalence (%)                  | 55 <sup>ns</sup> | 43 <sup>ns</sup> | 63               | 56 <sup>ns</sup> | 47 <sup>ns</sup> | 67              |

**Table S3.** Effect of complementing NF54 *Pfs47*KO parasites with different *Pfs47* haplotypes on infectivity to different anopheline mosquito species. Infection of *Anopheles gambiae* (Ag), *Anopheles dirus* (Ad) and *Anopheles albimanus* (Aa) mosquitoes with the *P. falciparum* NF54 *Pfs47*KO line and complemented derivatives expressing *Pfs47* haplotypes from *P. falciparum* NF54 (African), MRA1241 (Asian) and 7G8 (South American) strains. Table shows infection intensity and prevalence for two replicate experiments, results for Experiment 1 are also presented in Fig. 3 in the main text. Infection intensity medians were compared using the Mann-Whitney test and infection prevalences using the Chi-square test, ns = no significant difference, \* p<0.05, \*\*\* p<0.001, \*\*\*\* p<0.0001.

Table S4.

|                                 | Exxperiment 1              |                     | Experiment 2  |                     |
|---------------------------------|----------------------------|---------------------|---------------|---------------------|
| <i>Pfs47 KO</i>                 | <i>Anopheles gambiae</i>   |                     |               |                     |
|                                 | <i>dsLacZ</i>              | <i>Ag dsTEP1</i>    | <i>LacZ</i>   | <i>Ag dsTEP1</i>    |
| n (midguts)                     | 35                         | 29                  | 36            | 22                  |
| Oocyst/mgt Median               | 0                          | 9****               | 0             | 0                   |
| (range)                         | (0-22)                     | (0-45)              | 0             | (0-6)               |
| Prevalence (%)                  | 14                         | 63****              | 0             | 41****              |
| <i>Pfs47 KO</i>                 | <i>Anopheles dirus</i>     |                     |               |                     |
|                                 | <i>dsLacZ</i>              | <i>Ad dsLRIM1</i>   | <i>dsLacZ</i> | <i>A.d. dsLRIM1</i> |
| n (midguts)                     | 35                         | 36                  | 33            | 29                  |
| Oocyst/mgt Median               | 0                          | 3***                | 0             | 1***                |
| (range)                         | (0-5)                      | (0-22)              | (0-4)         | (0-8)               |
| Prevalence (%)                  | 29                         | 62***               | 25            | 74***               |
| <i>Pfs47 KO</i>                 | <i>Anopheles albimanus</i> |                     |               |                     |
|                                 | <i>dsLacZ</i>              | <i>A.a. dsLRIM1</i> | <i>dsLacZ</i> | <i>A.a. dsLRIM1</i> |
| n (midguts)                     | 25                         | 25                  | 22            | 31                  |
| Oocyst/mgt Median               | 0                          | 6****               | 0             | 19****              |
| (range)                         | 0                          | (0-21)              | 0             | (0-37)              |
| Prevalence (%)                  | 0                          | 80****              | 0             | 91****              |
| <i>KO + Pfs47 Africa NF54</i>   | <i>Anopheles gambiae</i>   |                     |               |                     |
|                                 | <i>dsLacZ</i>              | <i>Ag dsTEP1</i>    | <i>dsLacZ</i> | <i>Ag dsTEP1</i>    |
| n (midguts)                     | 28                         | 34                  | 32            | 36                  |
| Oocyst/mgt Median               | 3                          | 4 <sup>ns</sup>     | 6.5           | 8 <sup>ns</sup>     |
| (range)                         | (0-14)                     | (0-20)              | (0-22)        | (0-29)              |
| Prevalence (%)                  | 79                         | 77 <sup>ns</sup>    | 82            | 81 <sup>ns</sup>    |
| <i>KO + Pfs47 Asia MRA-1241</i> | <i>Anopheles dirus</i>     |                     |               |                     |
|                                 | <i>dsLacZ</i>              | <i>Ad dsTEP1</i>    | <i>dsLacZ</i> | <i>Ad dsTEP1</i>    |
| n (midguts)                     | 30                         | 28                  | 28            | 33                  |
| Oocyst/mgt Median               | 2                          | 2 <sup>ns</sup>     | 2             | 2.5 <sup>ns</sup>   |
| (range)                         | (0-6)                      | (0-8)               | (0-9)         | (0-11)              |
| Prevalence (%)                  | 70                         | 79 <sup>ns</sup>    | 72            | 70 <sup>ns</sup>    |
| <i>KO + Pfs47 Americas 7G8</i>  | <i>Anopheles albimanus</i> |                     |               |                     |
|                                 | <i>dsLacZ</i>              | <i>Aa dsTEP1</i>    | <i>dsLacZ</i> | <i>Aa dsTEP1</i>    |
| n (midguts)                     | 29                         | 22                  | 34            | 32                  |
| Oocyst/mgt Median               | 0                          | 1.5 <sup>ns</sup>   | 1             | 2 <sup>ns</sup>     |
| (range)                         | (0-6)                      | (0-9)               | (0-6)         | (0-14)              |
| Prevalence (%)                  | 69                         | 63 <sup>ns</sup>    | 47            | 62 <sup>ns</sup>    |

**Table S4.** Effect of disrupting the mosquito complement-like system, by silencing the leucine-rich repeat immune protein 1 (LRIM1) in *Anopheles dirus* (*Ad*) and *Anopheles albimanus* or the thioester-containing protein 1 (TEP1) of *Anopheles gambiae* (*Ag*), on infection with the NF54 *Pfs47KO* line or complemented derivatives. Female mosquitoes were injected with dsLacZ control, dsTEP1 or dsLRIM1 three days before feeding on a gametocyte culture. Table shows infection intensity and prevalence for two replicate experiments, results for Experiment 1 are also presented in Fig. 1 in the text. Infection intensity medians were compared using the Mann-Whitney test and infection prevalence using the Chi-square test, *ns* = no significant difference, \*  $p < 0.05$ , \*\*\*  $p < 0.001$ , \*\*\*\*  $p < 0.0001$ .

| Population 1    | Population 2 | Fst     |
|-----------------|--------------|---------|
| All populations |              | 0.69052 |
| Africa          | Asia         | 0.79551 |
| Africa          | Americas     | 0.75416 |
| Africa          | PNG          | 0.46926 |
| Asia            | Americas     | 0.87647 |
| Asia            | PNG          | 0.47820 |
| Americas        | PNG          | 0.60479 |

**Table S5.** Index of fixation (Fst) for *Pfs47* haplotypes. The Fst was estimated across all populations and pair-wise between each continental population. The high Fst values between the different continental populations indicate strong geographic differentiation of *Pfs47* between those regions.

|                   | SP (1-27aa) |    | Domain 1 (28-182aa) |    |    |    |     |     | Domain 2 (183-282aa) |     |     |     |     |     |     |     |     |     | Domain 3 (283-413aa) |     |     |     |     |     | GPI-anch. (413-439aa) |     | Number of haplotypes per region |     |     |     |        |      |     |          |
|-------------------|-------------|----|---------------------|----|----|----|-----|-----|----------------------|-----|-----|-----|-----|-----|-----|-----|-----|-----|----------------------|-----|-----|-----|-----|-----|-----------------------|-----|---------------------------------|-----|-----|-----|--------|------|-----|----------|
| Protein Haplotype | 13*         | 27 | 28                  | 46 | 55 | 68 | 144 | 178 | 186                  | 188 | 194 | 219 | 224 | 236 | 240 | 242 | 247 | 248 | 262                  | 270 | 272 | 273 | 297 | 303 | 314                   | 356 | 369                             | 408 | 426 | 433 | Africa | Asia | PNG | Americas |
| Hap 3D7           | I           | E  | L                   | V  | E  | T  | S   | I   | I                    | E   | P   | M   | I   | T   | L   | S   | V   | I   | L                    | E   | N   | Y   | I   | I   | I                     | T   | P                               | V   | I   | F   |        |      |     |          |
| Hap 1             | .           | D  | .                   | .  | .  | .  | .   | .   | .                    | .   | H   | .   | .   | .   | .   | .   | .   | L   | .                    | .   | .   | .   | .   | .   | .                     | .   | H                               | .   | .   | .   | 1      | 0    | 0   | 0        |
| Hap 2             | .           | D  | .                   | .  | .  | .  | .   | .   | .                    | .   | H   | .   | .   | .   | .   | .   | .   | L   | .                    | .   | I   | .   | .   | .   | .                     | .   | .                               | .   | .   | 1   | 0      | 0    | 0   |          |
| Hap 3             | .           | D  | .                   | .  | .  | .  | .   | .   | .                    | .   | H   | .   | .   | .   | .   | .   | .   | L   | .                    | .   | I   | .   | .   | .   | .                     | .   | .                               | .   | .   | 1   | 0      | 0    | 0   |          |
| Hap 4             | .           | D  | .                   | .  | .  | .  | .   | .   | .                    | .   | H   | .   | .   | .   | .   | .   | .   | L   | .                    | .   | .   | .   | .   | .   | .                     | .   | .                               | .   | .   | 6   | 0      | 0    | 0   |          |
| Hap 5             | .           | D  | .                   | .  | .  | .  | .   | .   | .                    | .   | H   | .   | .   | .   | .   | .   | .   | L   | .                    | .   | .   | .   | .   | .   | .                     | .   | .                               | .   | .   | 27  | 0      | 0    | 0   |          |
| Hap 6             | .           | D  | .                   | .  | .  | .  | .   | .   | .                    | .   | H   | .   | .   | .   | I   | .   | .   | L   | .                    | .   | .   | .   | .   | .   | .                     | .   | .                               | .   | .   | 1   | 0      | 0    | 0   |          |
| Hap 7             | .           | .  | .                   | .  | .  | .  | .   | .   | .                    | .   | H   | .   | .   | .   | I   | .   | .   | L   | .                    | .   | .   | .   | .   | .   | .                     | .   | .                               | .   | .   | 1   | 0      | 0    | 0   |          |
| Hap 8             | .           | .  | .                   | .  | .  | .  | .   | .   | .                    | D   | H   | .   | .   | .   | .   | .   | .   | L   | .                    | .   | .   | .   | .   | .   | .                     | .   | .                               | .   | .   | 4   | 0      | 1    | 0   |          |
| Hap 9             | .           | .  | .                   | .  | .  | .  | .   | .   | .                    | .   | H   | .   | .   | .   | .   | .   | .   | L   | .                    | .   | .   | .   | .   | .   | .                     | S   | .                               | .   | .   | 1   | 0      | 0    | 0   |          |
| Hap 10            | .           | .  | .                   | .  | .  | .  | .   | .   | .                    | .   | H   | .   | .   | .   | .   | .   | .   | L   | .                    | .   | .   | .   | .   | .   | V                     | .   | .                               | .   | .   | 1   | 0      | 0    | 0   |          |
| Hap 11            | .           | .  | .                   | .  | .  | .  | N   | .   | .                    | .   | H   | .   | .   | .   | .   | .   | .   | L   | .                    | .   | .   | .   | .   | .   | .                     | .   | .                               | .   | .   | 2   | 0      | 0    | 0   |          |
| Hap 12            | .           | .  | .                   | .  | .  | .  | .   | .   | .                    | .   | H   | .   | .   | .   | .   | .   | .   | L   | .                    | .   | .   | .   | .   | .   | .                     | K   | .                               | .   | .   | 1   | 0      | 0    | 0   |          |
| Hap 13            | .           | .  | .                   | .  | .  | .  | .   | .   | .                    | .   | H   | .   | .   | .   | .   | .   | .   | L   | .                    | .   | .   | .   | .   | .   | .                     | .   | .                               | .   | .   | 102 | 0      | 0    | 0   |          |
| Hap 14            | .           | .  | .                   | .  | .  | .  | .   | .   | .                    | .   | H   | .   | .   | .   | .   | .   | .   | L   | .                    | .   | .   | .   | .   | .   | .                     | .   | .                               | .   | .   | 4   | 0      | 0    | 0   |          |
| Hap 15            | T           | .  | .                   | .  | .  | .  | .   | .   | .                    | .   | H   | .   | .   | .   | .   | .   | .   | L   | .                    | .   | .   | .   | .   | .   | .                     | .   | H                               | .   | .   | 1   | 0      | 0    | 0   |          |
| Hap 16            | .           | .  | .                   | .  | .  | .  | .   | .   | .                    | .   | H   | .   | .   | .   | .   | .   | .   | L   | .                    | .   | .   | .   | .   | .   | .                     | .   | H                               | .   | .   | 3   | 0      | 0    | 0   |          |
| Hap 17            | .           | .  | .                   | .  | .  | .  | .   | .   | .                    | .   | H   | .   | .   | .   | .   | .   | .   | L   | .                    | .   | .   | .   | .   | .   | .                     | .   | H                               | .   | .   | 6   | 0      | 0    | 0   |          |
| Hap 18            | .           | .  | .                   | .  | .  | .  | .   | .   | .                    | .   | H   | .   | .   | .   | .   | .   | .   | L   | .                    | .   | I   | .   | .   | .   | .                     | .   | H                               | .   | .   | 1   | 0      | 0    | 0   |          |
| Hap 19            | .           | .  | .                   | .  | .  | .  | .   | .   | .                    | .   | H   | .   | .   | .   | .   | .   | .   | L   | .                    | .   | I   | .   | .   | .   | .                     | .   | H                               | .   | .   | 4   | 0      | 0    | 0   |          |
| Hap 20            | .           | .  | .                   | .  | .  | .  | .   | .   | .                    | .   | .   | .   | .   | .   | .   | .   | .   | L   | .                    | .   | .   | .   | .   | .   | .                     | .   | .                               | .   | .   | 12  | 0      | 0    | 0   |          |
| Hap 21            | .           | .  | .                   | .  | .  | .  | .   | .   | .                    | .   | .   | .   | .   | .   | .   | .   | .   | L   | L                    | .   | Q   | .   | .   | .   | .                     | .   | .                               | .   | .   | 1   | 0      | 0    | 0   |          |
| Hap 22            | .           | .  | .                   | .  | .  | .  | .   | .   | .                    | .   | H   | .   | .   | .   | .   | .   | .   | L   | .                    | .   | Y   | N   | .   | .   | .                     | .   | .                               | .   | .   | 1   | 0      | 0    | 0   |          |
| Hap 23            | .           | D  | .                   | .  | .  | .  | .   | .   | .                    | .   | H   | .   | .   | .   | .   | .   | .   | L   | .                    | .   | Y   | N   | .   | .   | .                     | .   | .                               | .   | .   | 1   | 0      | 0    | 0   |          |
| Hap 24            | .           | .  | .                   | .  | .  | .  | .   | .   | .                    | .   | H   | I   | .   | .   | .   | .   | .   | L   | .                    | .   | Y   | .   | .   | .   | .                     | .   | .                               | .   | .   | 8   | 0      | 0    | 0   |          |
| Hap 25            | .           | .  | .                   | .  | .  | .  | .   | .   | .                    | .   | H   | .   | .   | .   | .   | .   | .   | L   | .                    | .   | I   | .   | .   | .   | .                     | .   | .                               | .   | .   | 1   | 0      | 0    | 0   |          |
| Hap 26            | .           | .  | .                   | .  | .  | .  | .   | .   | .                    | .   | H   | .   | .   | .   | .   | .   | .   | L   | .                    | .   | I   | .   | .   | .   | .                     | .   | .                               | .   | .   | 14  | 0      | 0    | 0   |          |
| Hap 27            | .           | .  | .                   | .  | .  | .  | .   | .   | .                    | D   | H   | .   | .   | .   | .   | .   | .   | L   | .                    | .   | I   | .   | .   | .   | .                     | .   | .                               | .   | .   | 5   | 0      | 0    | 0   |          |
| Hap 28            | .           | .  | .                   | .  | .  | .  | .   | .   | .                    | D   | H   | .   | .   | .   | .   | .   | .   | L   | .                    | .   | .   | .   | .   | .   | .                     | .   | H                               | .   | .   | 3   | 0      | 0    | 0   |          |
| Hap 29            | .           | .  | .                   | .  | .  | .  | .   | .   | .                    | D   | H   | .   | .   | .   | .   | .   | .   | L   | .                    | .   | .   | .   | .   | .   | .                     | .   | .                               | .   | .   | 1   | 0      | 0    | 0   |          |
| Hap 30            | .           | .  | .                   | .  | .  | .  | .   | .   | .                    | .   | H   | .   | .   | .   | .   | .   | .   | L   | .                    | .   | .   | .   | .   | .   | .                     | .   | .                               | .   | .   | 14  | 0      | 0    | 0   |          |
| Hap 31            | .           | .  | .                   | .  | .  | .  | .   | .   | .                    | .   | H   | .   | .   | I   | .   | .   | .   | L   | .                    | .   | .   | .   | .   | .   | .                     | .   | .                               | .   | .   | 0   | 1      | 0    | 0   |          |
| Hap 32            | .           | .  | .                   | L  | .  | .  | .   | .   | .                    | .   | H   | .   | .   | .   | .   | .   | .   | L   | F                    | .   | .   | .   | .   | .   | .                     | .   | .                               | .   | L   | .   | 1      | 0    | 0   | 0        |
| Hap 33            | .           | .  | .                   | .  | .  | .  | .   | .   | .                    | .   | H   | .   | .   | .   | .   | .   | .   | L   | F                    | .   | .   | .   | .   | .   | .                     | .   | .                               | .   | .   | 0   | 0      | 13   | 0   |          |
| Hap 34            | .           | .  | .                   | .  | .  | .  | .   | .   | .                    | .   | H   | .   | .   | I   | .   | L   | A   | L   | .                    | .   | .   | .   | .   | .   | .                     | .   | .                               | .   | .   | 1   | 0      | 1    | 28  |          |
| Hap 35            | .           | .  | .                   | .  | .  | M  | .   | V   | .                    | .   | H   | .   | .   | .   | .   | L   | A   | L   | .                    | .   | .   | .   | .   | .   | .                     | .   | .                               | .   | .   | 0   | 0      | 0    | 6   |          |
| Hap 36            | .           | .  | .                   | .  | .  | .  | V   | .   | .                    | .   | H   | .   | .   | .   | .   | .   | .   | L   | .                    | .   | .   | .   | .   | .   | .                     | .   | .                               | .   | .   | 0   | 0      | 0    | 2   |          |
| Hap 37            | .           | .  | .                   | I  | .  | .  | .   | .   | .                    | .   | H   | .   | N   | I   | I   | .   | .   | L   | .                    | .   | Y   | .   | .   | .   | .                     | .   | .                               | .   | .   | 0   | 1      | 0    | 0   |          |
| Hap 38            | .           | .  | .                   | .  | .  | .  | .   | .   | .                    | .   | H   | .   | N   | I   | I   | .   | .   | L   | .                    | .   | Y   | .   | .   | .   | .                     | .   | .                               | .   | L   | V   | 0      | 1    | 0   | 0        |
| Hap 39            | .           | .  | .                   | .  | .  | .  | .   | .   | .                    | .   | H   | .   | N   | I   | I   | .   | .   | L   | .                    | .   | Y   | .   | .   | .   | .                     | .   | .                               | .   | .   | 0   | 30     | 0    | 0   |          |
| Hap 40            | .           | .  | .                   | I  | .  | K  | .   | .   | .                    | K   | H   | .   | N   | I   | I   | .   | .   | L   | .                    | .   | .   | .   | .   | .   | .                     | .   | .                               | .   | .   | 0   | 5      | 0    | 0   |          |
| Hap 41            | .           | .  | .                   | I  | .  | K  | .   | .   | .                    | K   | H   | .   | N   | I   | I   | .   | .   | L   | .                    | .   | .   | .   | .   | L   | .                     | .   | .                               | I   | .   | 0   | 1      | 0    | 0   |          |
| Hap 42            | .           | .  | .                   | I  | .  | K  | .   | .   | .                    | .   | H   | .   | N   | I   | I   | .   | .   | L   | .                    | .   | Y   | .   | .   | .   | .                     | .   | .                               | .   | .   | 1   | 34     | 8    | 0   |          |

**Table S6.** Sequence polymorphisms and regional frequencies of *Pfs47* protein haplotypes. Amino acid changes are indicated for each *Pfs47* haplotype in reference to *Pfs47* 3D7. The number of isolates with a given *Pfs47* haplotype is indicated for different geographic regions. The predicted *Pfs47* domain structure is indicated (SP, signal peptide; GPI-anch, GPI anchorage). Order of *Pfs47* haplotypes and color shading corresponds to the phylogenetic tree in Fig. 2 of the main text. \*Indicates amino acid position.

**Table S7.** Sequence of oligonucleotide primers used in this study

| Primer name  | Sequence                                                                              |
|--------------|---------------------------------------------------------------------------------------|
| prFRTFfs47F  | ATCGATAACTCCATGGGAAGTTCCTATACTTTCTAGAGAATAGGAACTTCGAATCTCATTTATATTCTGCTTA             |
| prattBPfs47R | CCTAGGAGTTCATGGCCGCGATGATCCTGACGACGGAGACCGCCGTCGTCGACAAGCCGTTATAACATATACATGCCTTCCTTAT |
| prB2F        | AGAATACTCGCGGCCGCGAGTTTCATTAAGGAATAACTAATTCCTAATGAAACTCCGCGGGGAGGACTAGTCCG            |
| prB2R        | CGGACTAGTCTCCCCGCGGGAGTTTCATTAGGGAATTAGTTATTCCTTAATGAAACTCGCGGCCGCGAGTATTCT           |
| prB2FRTF     | GCAGCCCGGGGATCCGAGTTTCATTAAGGAATAACTAATTCCTAATGAAACTCGCGGCCGCGAAGTTCCTATTCTCTA        |
| prB2FRTR     | AAATACTAGTGGATCGAAGTTCCTATACTTTCTAGAGAATAGGAACTTCGCGGCCGCGAGTTTCATTAGGGAATTA          |
| prattPF      | ATGTTTTTATAAACCAAGCTTGGGGTTTGTAACCGTACACCACTGAGACCGCGGTGGTTGACCAGACAAACCTCGAGGG       |
| prattPR      | AGCTGGAGTCCACCCTCGAGGTTTGTCTGGTCAACCACCGCGTCTCAGTGGTGTACGGTACAAACCCCAAGCTTGG          |
| prClaF       | AAAAATTAGATATCGATAAAAAAGTATGCAATAAATTCATC                                             |
| prClaR       | GTCTTTTGCGAATCGATTTCCTTTTCATATAATACATGTTTA                                            |
| prIA1F       | GTATGGGAAGAATGATCAGC                                                                  |
| prIA1R       | CCGCGATGATCCTGACG                                                                     |
| prIA2F       | CCTATACTTTCTAGAGAATAGGAACTTC                                                          |
| prIA2R       | TCATATGCTAACATACATGTAAAAAA                                                            |
| prIA1'F      | TCATATGCTAACATACATGTA                                                                 |
| prIA1'R      | ATGTTATACACATAATGTGTTAGGA                                                             |
| prIA2'F      | GATGGGTGTGATTTTACGAA                                                                  |
| prIA2'R      | CCATATGCGGTGTGAAATACCG                                                                |
| 0203F        | GATGCTGCTGGAAAACTAC                                                                   |
| 0203R        | CCTACATCCCATACGGTAAA                                                                  |
| PF13_0248F   | GCAGGCATTAAATGTCCATA                                                                  |
| PF13_0248R   | CTTTTGCGAATCGATTTCCT                                                                  |
